# Supplementary material for: Highly Soluble Monoamino-Substituted Perylene Tetracarboxylic Dianhydrides: Synthesis, Optical and Electrochemical Properties
Source: MDPI journal article supplement (doi:10.3390/ijms151222642), 2014-12-08

## Supplementary Information

**Figure S1.** Normalized emission spectra of **1b** in various solvents.

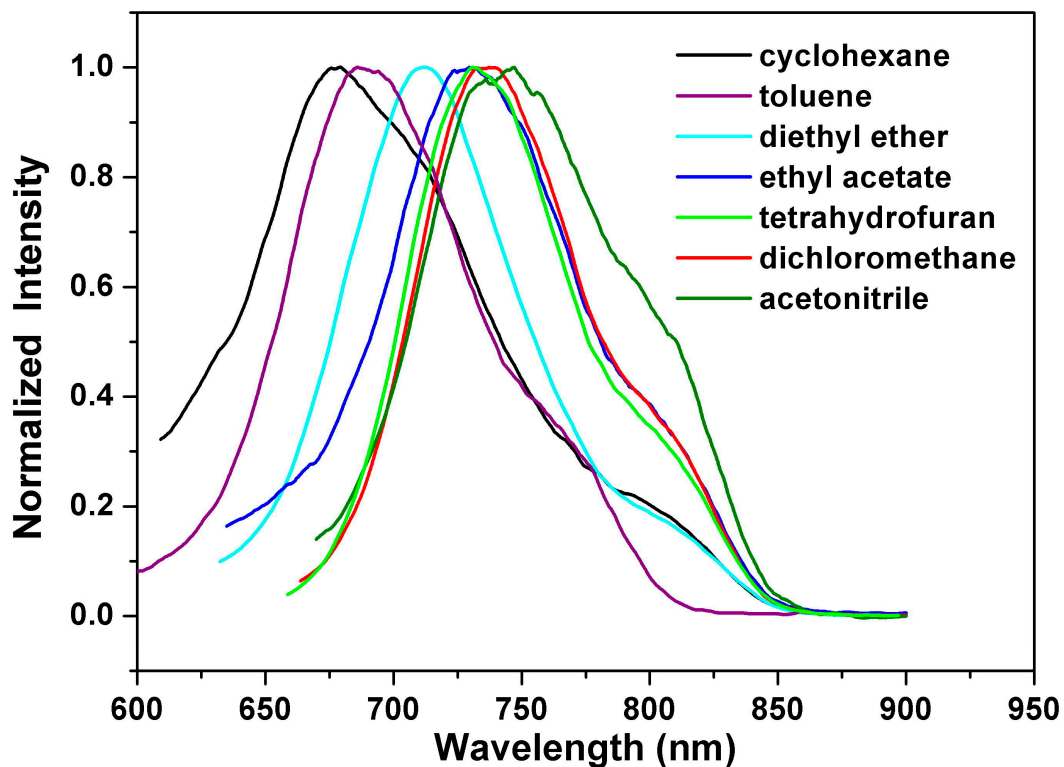

**Figure S2.** Normalized emission spectra of **1c** in various solvents.

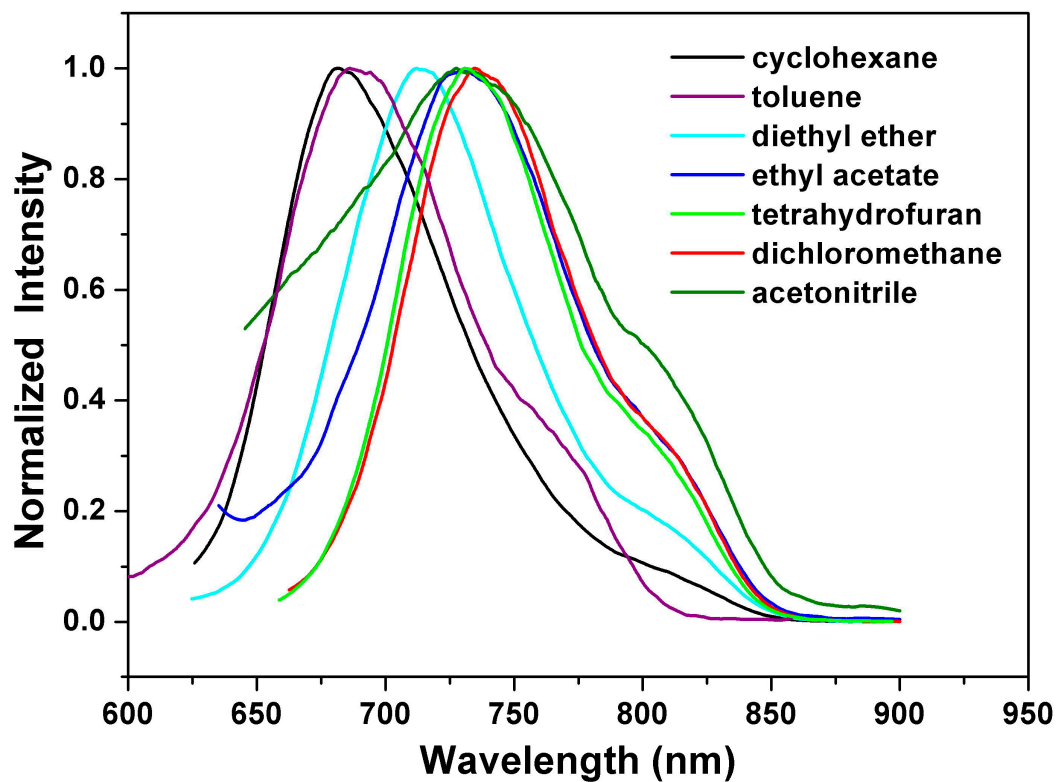

**Figure S3.** Normalized absorption spectra of **1b** at different concentrations in ethyl acetate.

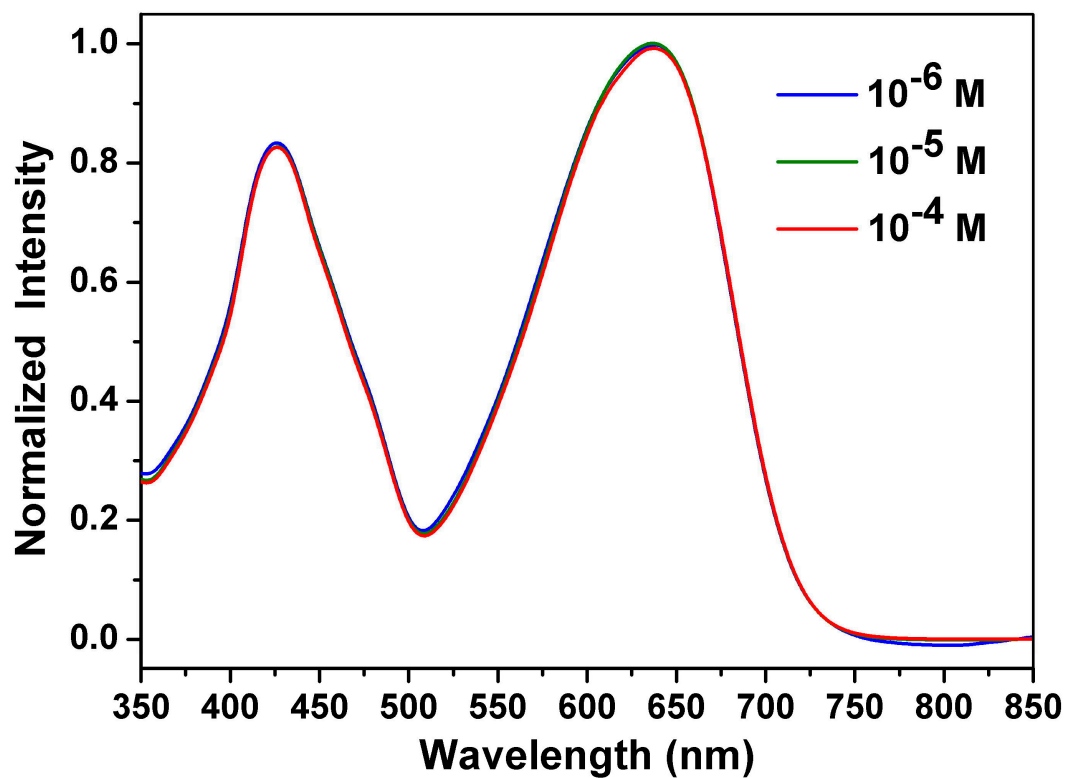

**Figure S4.** Normalized absorption spectra of **1c** at different concentrations in ethyl acetate.

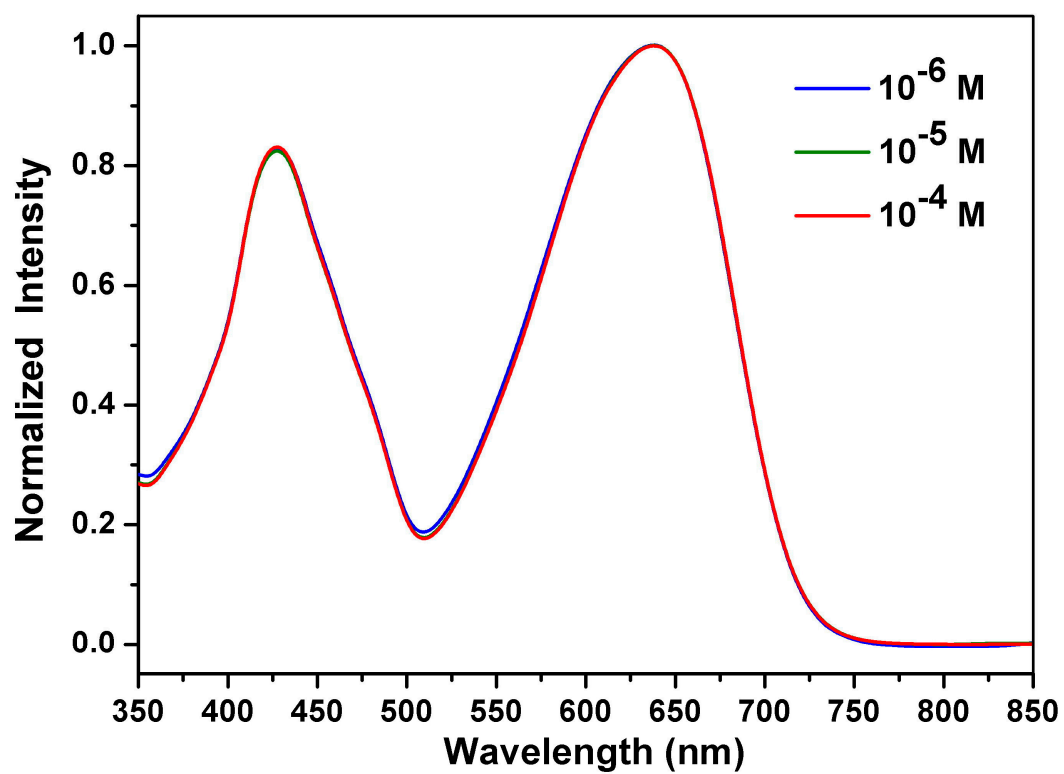

**Figure S5.** Normalized absorption spectra of **3** at different concentrations in ethyl acetate.

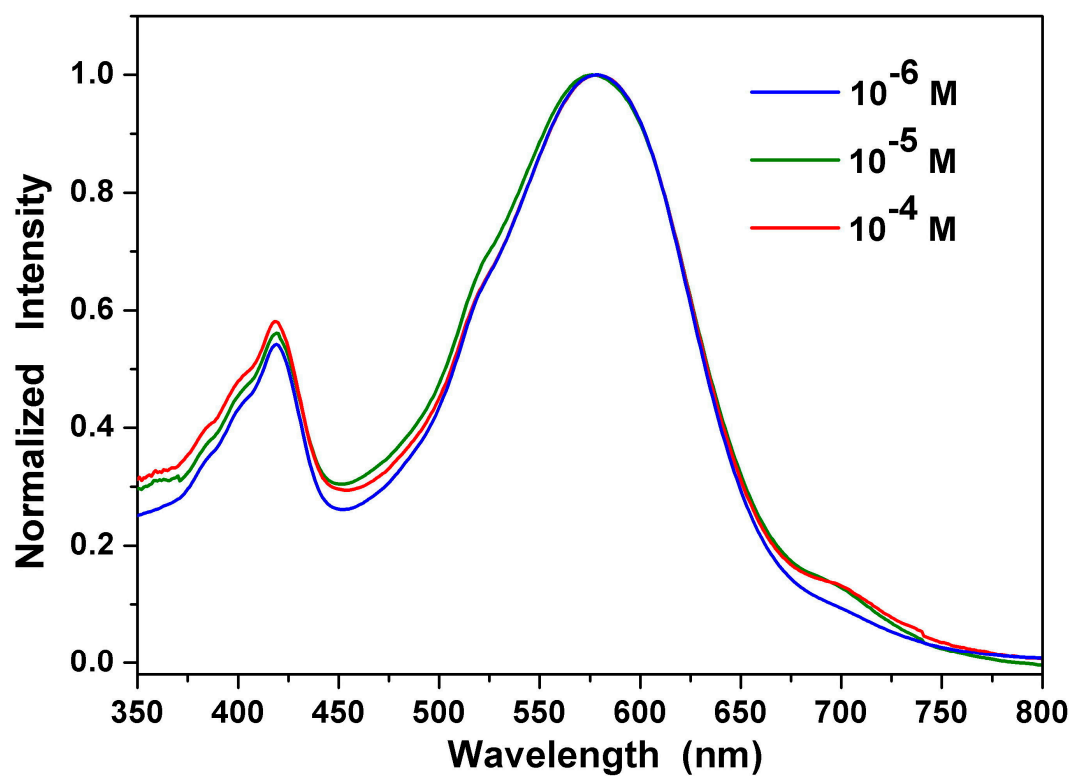

**Figure S6.**  $^1\text{H}$  NMR of **1b**.

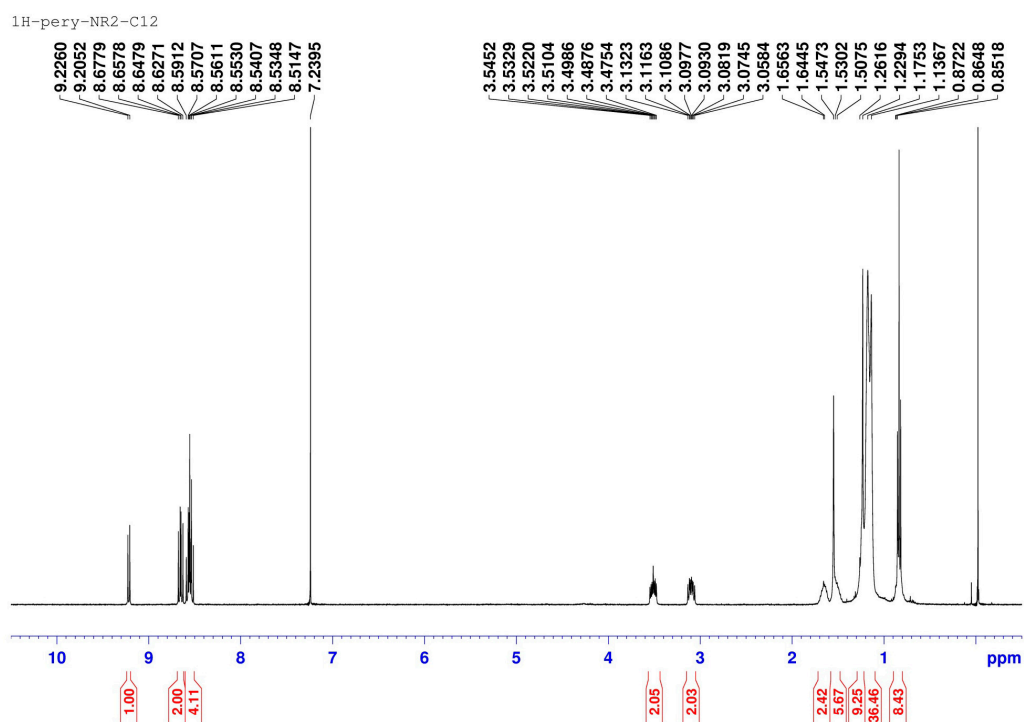

Figure S7.  $^1\text{H}$  NMR of 1c.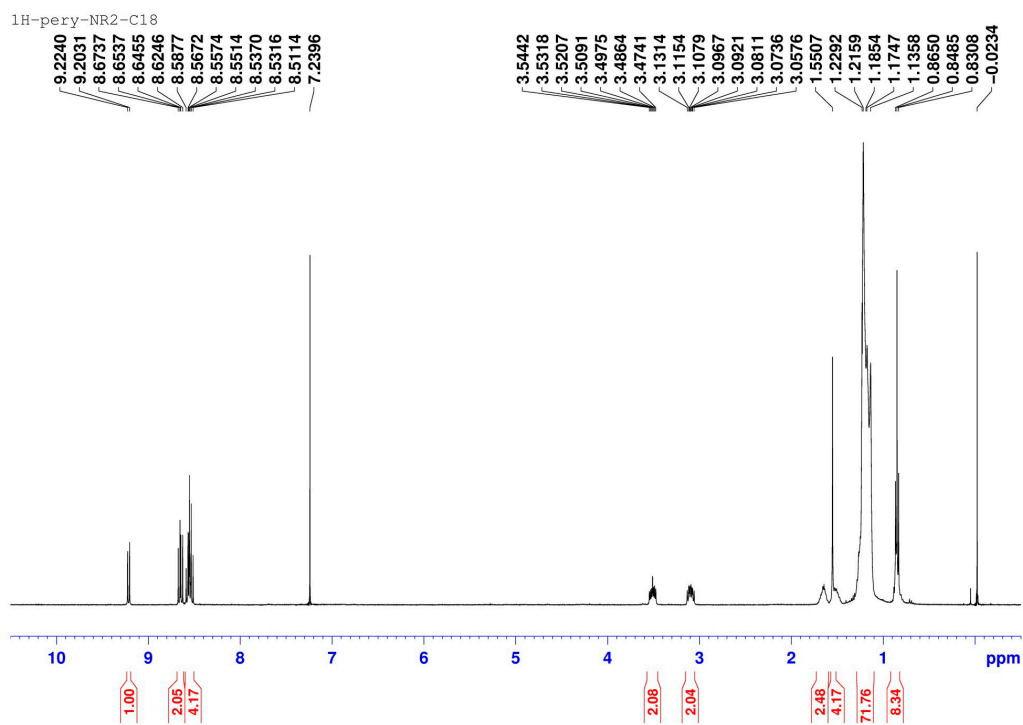Figure S8.  $^1\text{H}$  NMR of 2a.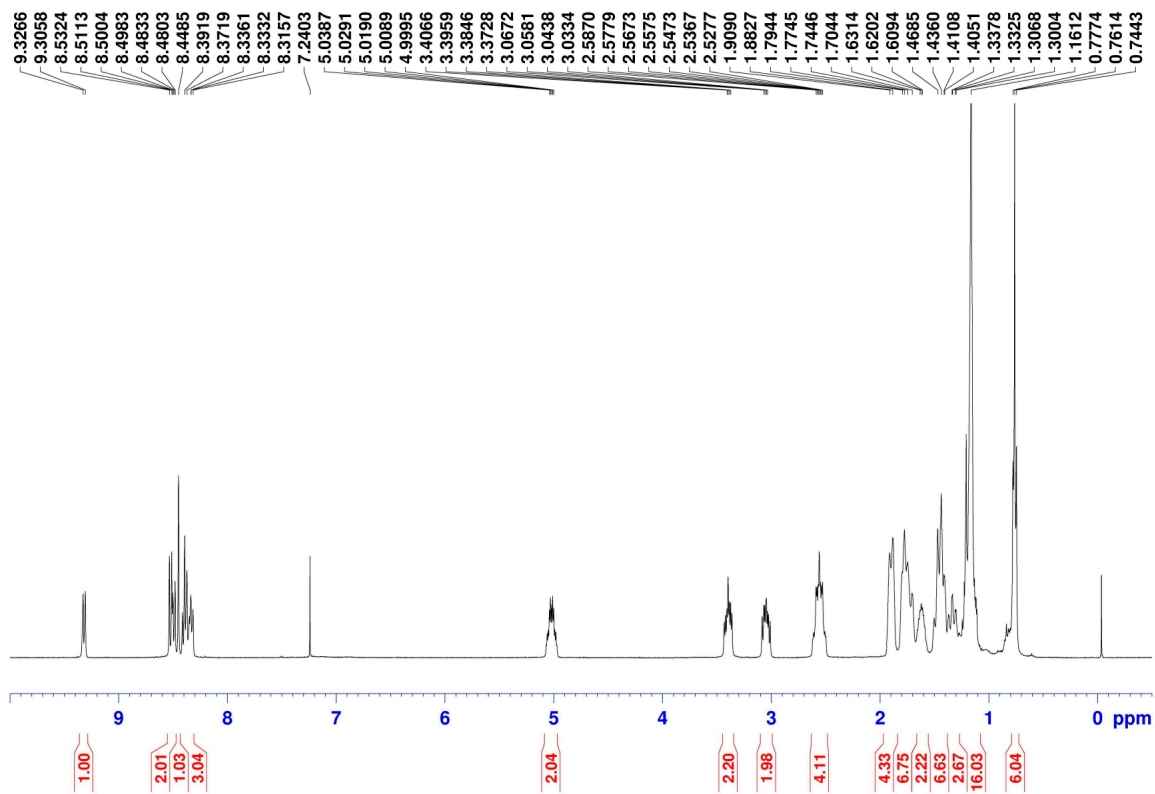

Figure S9.  $^1\text{H}$  NMR of 2b.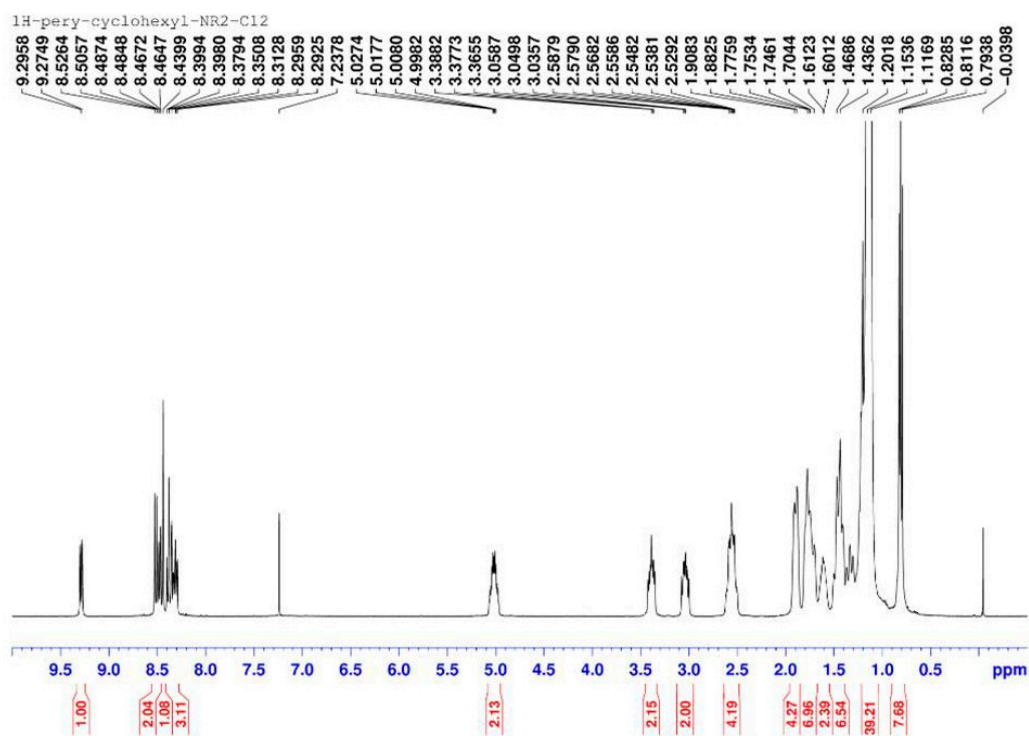Figure S10.  $^1\text{H}$  NMR of 2c.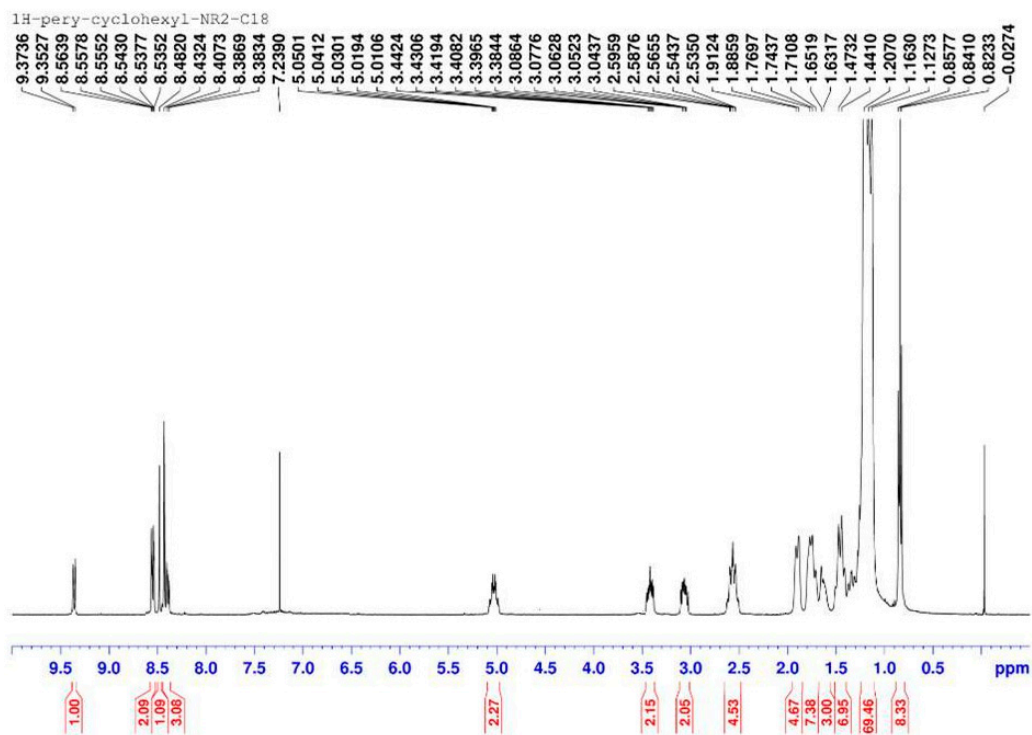

**Figure S11.**  $^{13}\text{C}$  NMR of **1b**.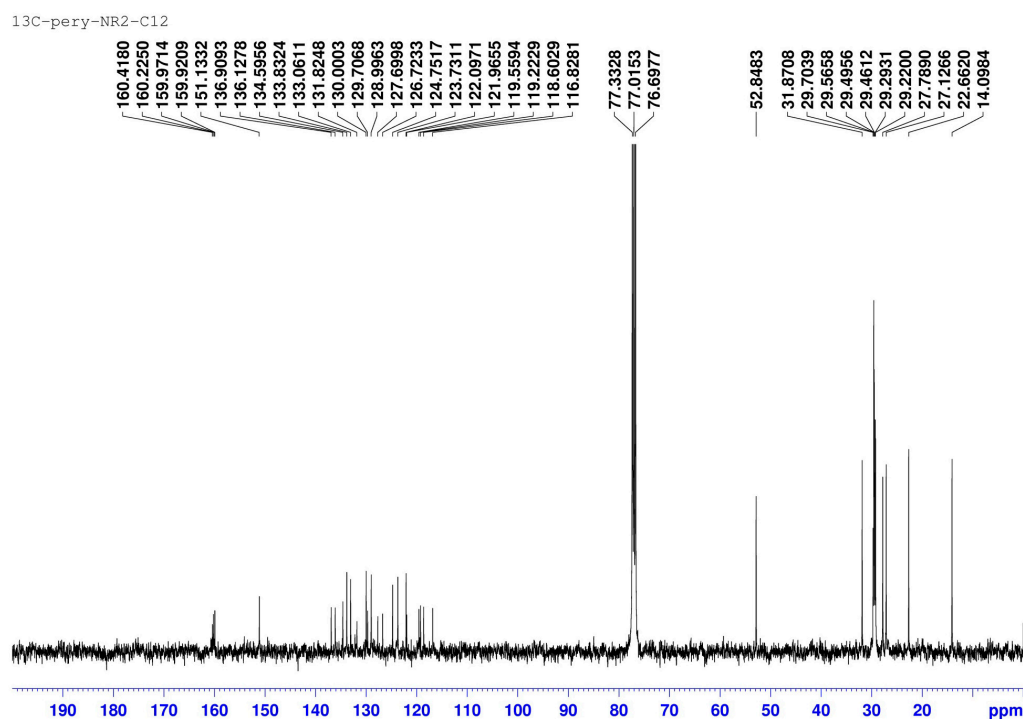**Figure S12.**  $^{13}\text{C}$  NMR of **1c**.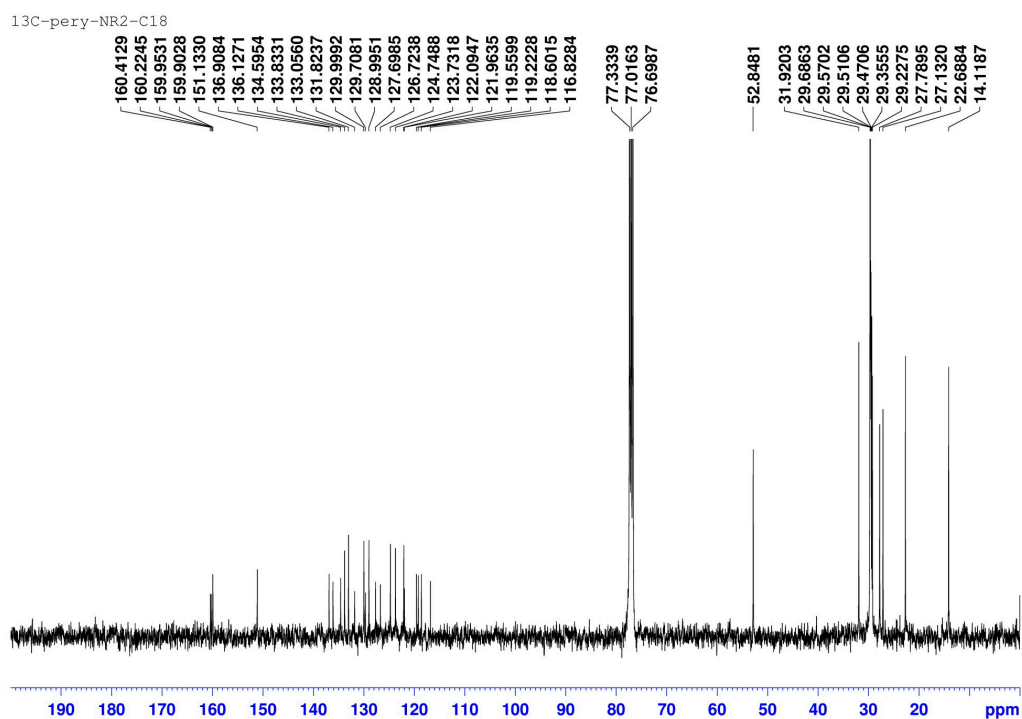

Figure S13.  $^{13}\text{C}$  NMR of 2a.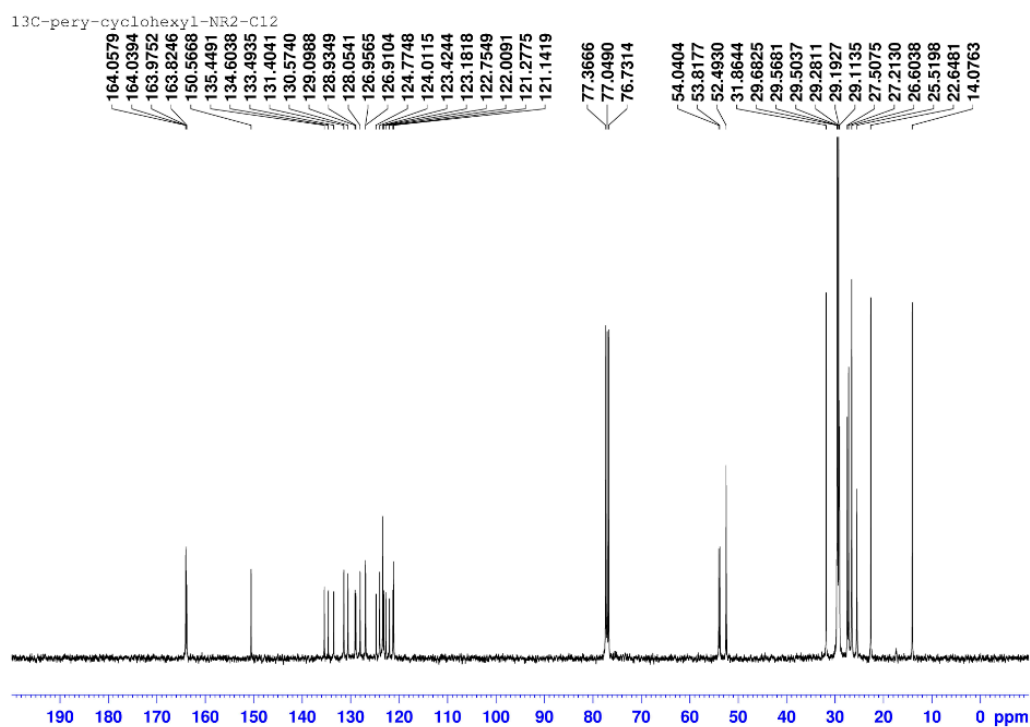Figure S14.  $^{13}\text{C}$  NMR of 2b.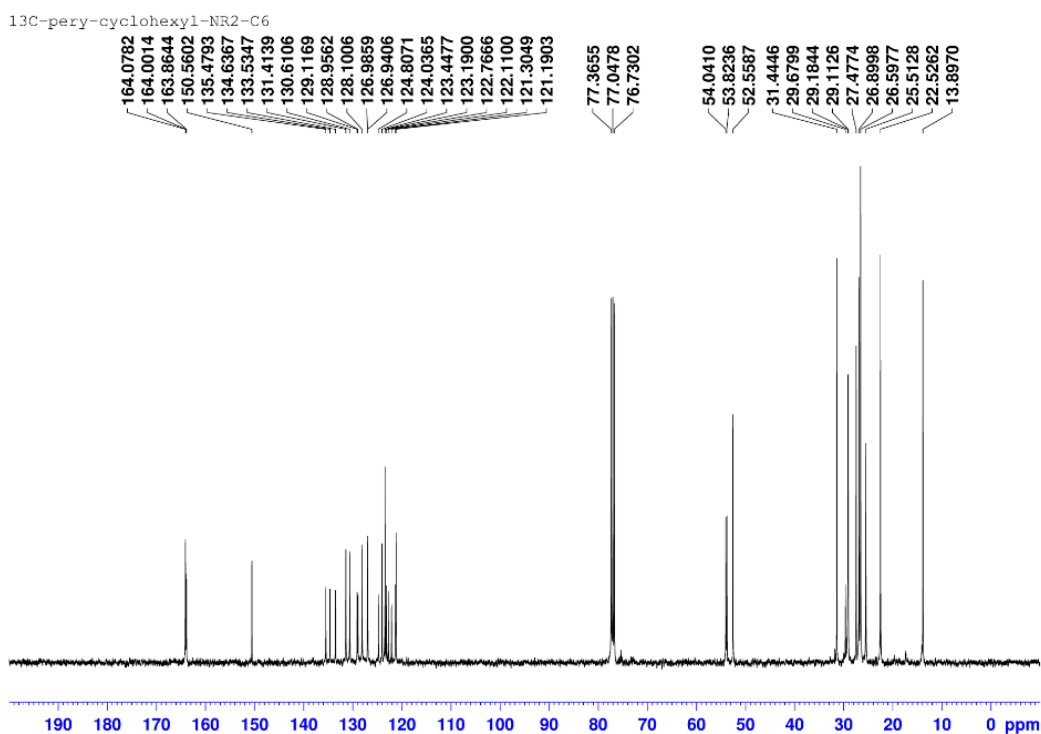

Figure S15.  $^{13}\text{C}$  NMR of 2c.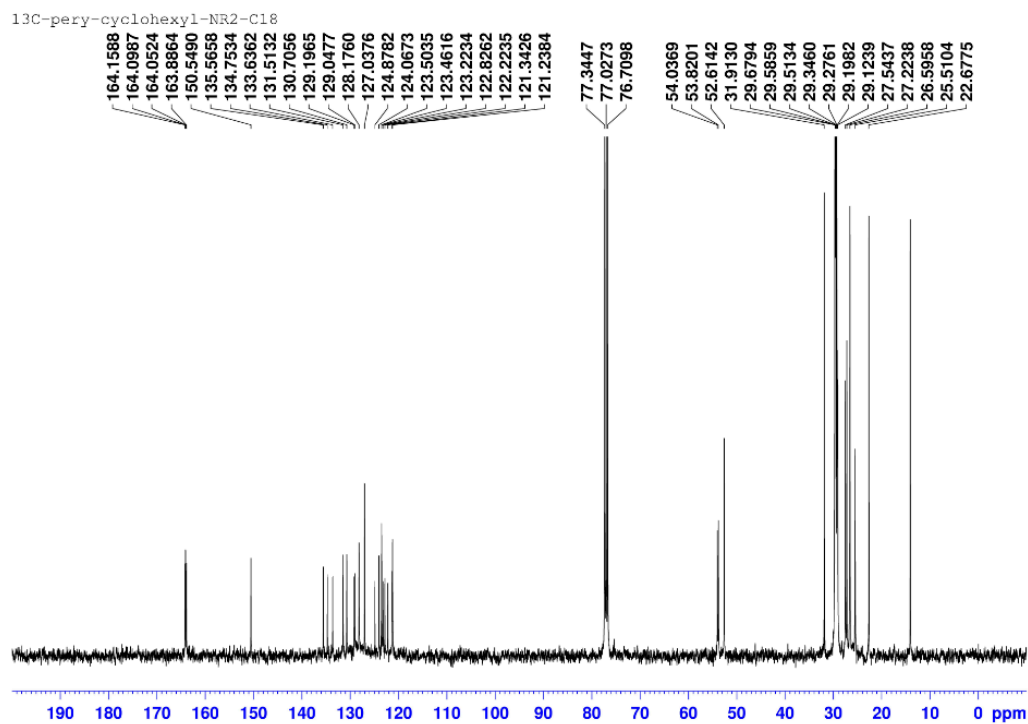

Supplement: s1 [file s1]
